# Supplementary material for: Correlation of histologic chorioamnionitis and intra-partum leukocytosis
Source: Research Square preprint supplement (doi:10.21203/rs.3.rs-151867/v1), 2021-01-26
Supplement: Supplementary file 1 [file 1569e49415c11ecb32305817.xlsx]

## Sheet: Sheet 1 - Baseline Characters T
Table 3: Pre-term delivery and chorioamnionitis
Pre-term delivery (Less than 37 weeks)	Negative	Positive	p value
	(N=1249)	(N=151)
Maternal.age	32.0 [28.0;36.0]	32.0 [28.0;36.0]	0.534
Vasculopathy			0.001
- Classic type	353 (28.3%)	41 (27.2%)
- Mixed type	69 ( 5.5%)	21 (13.9%)
- Mural hypertrophy	83 ( 6.6%)	7 ( 4.6%)
- No vasculopathy	744 (59.6%)	82 (54.3%)
Delivery			0.082
- Cesarean	451 (36.1%)	66 (43.7%)
- Vaginal	798 (63.9%)	85 (56.3%)
Preeclampsia/PIH			0
0	1080 (86.5%)	109 (72.2%)
-1	169 (13.5%)	42 (27.8%)
Placental weight (grams)	465.0 [402.0;539.0]	363.0 [256.5;439.5]	0
Gestational age (weeks)	39.0 [39.0;40.0]	35.0 [31.5;36.0]	0
Pre-term delivery 32 W or less			0
0	1249 (100.0%)	113 (74.8%)
-1	0 ( 0.0%)	38 (25.2%)
Infarcts			0
0	1173 (93.9%)	125 (82.8%)
-1	76 ( 6.1%)	26 (17.2%)
Chorioamnionitis			0.732
0	767 (61.4%)	90 (59.6%)
-1	482 (38.6%)	61 (40.4%)
Deciduitis			0.104
0	771 (61.7%)	104 (68.9%)
-1	478 (38.3%)	47 (31.1%)
Funisitis			0.38
0	1041 (83.3%)	121 (80.1%)
-1	208 (16.7%)	30 (19.9%)
Meconium			0
0	867 (69.4%)	139 (92.1%)
-1	382 (30.6%)	12 ( 7.9%)
Thrombosis			0.245
0	936 (74.9%)	106 (70.2%)
-1	313 (25.1%)	45 (29.8%)
GDM2			0.242
0	1115 (89.3%)	140 (92.7%)
-1	134 (10.7%)	11 ( 7.3%)
Category 2 fetal heart tracing			0.005
0	1013 (81.1%)	137 (90.7%)
-1	236 (18.9%)	14 ( 9.3%)
Chronic villitis			0.004
0	939 (75.2%)	130 (86.1%)
-1	310 (24.8%)	21 (13.9%)
Abruption			0.02
0	1225 (98.1%)	143 (94.7%)
-1	24 ( 1.9%)	8 ( 5.3%)
IUGR			0.84
0	1200 (96.1%)	144 (95.4%)
-1	49 ( 3.9%)	7 ( 4.6%)
Twin pregnancy			0
0	1233 (98.7%)	137 (90.7%)
-1	16 ( 1.3%)	14 ( 9.3%)
Cord issues			0.012
0	1190 (95.3%)	136 (90.1%)
-1	59 ( 4.7%)	15 ( 9.9%)
MPFD/MFI			0.085
0	1189 (95.3%)	149 (98.7%)
-1	59 ( 4.7%)	2 ( 1.3%)
Others			0.413
0	1190 (95.3%)	141 (93.4%)
-1	59 ( 4.7%)	10 ( 6.6%)
IUFD			0
0	1249 (100.0%)	143 (94.7%)
-1	0 ( 0.0%)	8 ( 5.3%)
Cord coiling	4.0 [ 3.0; 5.0]	3.0 [ 2.0; 5.0]	0.037
Oligohydramnios			0.545
0	1229 (98.4%)	147 (97.4%)
-1	20 ( 1.6%)	4 ( 2.6%)
Avascular.villi			0.738
0	1109 (88.8%)	136 (90.1%)
-1	140 (11.2%)	15 ( 9.9%)
Total WBC count (normal range <10.3)	9.6 [ 8.2;11.8]	9.6 [ 7.8;11.7]	0.464
Leukocytosis groups			0.9
Group 1 (<10.3, normal)	496 (58.8%)	56 (56.0%)
Group 2 (10.4 to 12)	166 (19.7%)	22 (22.0%)
Group 3 (>12 but <15)	123 (14.6%)	16 (16.0%)
Group 4 (>15)	58 ( 6.9%)	6 ( 6.0%)
Neutrophil differential (Normal range 75.6%)	73.6 [68.6;78.6]	73.4 [67.2;78.0]	0.598
Left shift (>75.6%)			1
0	510 (60.9%)	60 (60.6%)
-1	327 (39.1%)	39 (39.4%)
Lymphocytes (%)	17.7 [14.0;21.7]	18.5 [14.5;22.4]	0.482
Lymphopenia (Less than 15.5%)			0.739
0	762 (66.3%)	89 (64.5%)
-1	387 (33.7%)	49 (35.5%)
Body temperature	36.8 [36.5;37.0]	36.8 [36.5;37.0]	0.467
BMI	24.2 [23.5;25.0]	24.2 [23.1;25.0]	0.69
