# Supplementary material for: Correlation of histologic chorioamnionitis and intra-partum leukocytosis
Source: Research Square preprint supplement (doi:10.21203/rs.3.rs-151867/v1), 2021-01-26
Supplement: Supplementary file 2 [file 42a5e866269f4e5a3c1df167.xlsx]

## Sheet: Sheet 1 - Chorioamnionitis tabl
Table 1: Acute chorioamnionitis and other associated complications
Acute chorioamnionitis	Absent	Present	p value
	(N=857)	(N=543)
Maternal age	32.0 [28.0;36.0]	31.0 [27.5;35.0]	0.108
Vasculopathy			0
- Classic type	236 (27.5%)	158 (29.1%)
- Mixed type	73 ( 8.5%)	17 ( 3.1%)
- Mural hypertrophy	73 ( 8.5%)	17 ( 3.1%)
- No vasculopathy	475 (55.4%)	351 (64.6%)
Delivery			0.362
- Cesaren	325 (37.9%)	192 (35.4%)
- Vaginal	532 (62.1%)	351 (64.6%)
Clinical indication			0.115
0	145 (16.9%)	74 (13.6%)
-1	712 (83.1%)	469 (86.4%)
Preeclampsia/PIH			0
0	698 (81.4%)	491 (90.4%)
-1	159 (18.6%)	52 ( 9.6%)
Placental weight	450.0 [389.0;532.0]	461.0 [393.5;537.5]	0.271
Gestational age	39.0 [38.0;40.0]	40.0 [38.5;40.0]	0
Pre-term (less than 37 weeks)			0.732
0	767 (89.5%)	482 (88.8%)
-1	90 (10.5%)	61 (11.2%)
Pre-term (less than 32 weeks)			0.022
0	841 (98.1%)	521 (95.9%)
-1	16 ( 1.9%)	22 ( 4.1%)
Infarcts			0.201
0	788 (91.9%)	510 (93.9%)
-1	69 ( 8.1%)	33 ( 6.1%)
Chronic deciduitis			0
0	568 (66.3%)	307 (56.5%)
-1	289 (33.7%)	236 (43.5%)
Acute funisitis			0
0	856 (99.9%)	306 (56.4%)
-1	1 ( 0.1%)	237 (43.6%)
Meconium			0.653
0	620 (72.3%)	386 (71.1%)
-1	237 (27.7%)	157 (28.9%)
Thrombosis			0.153
0	626 (73.0%)	416 (76.6%)
-1	231 (27.0%)	127 (23.4%)
GDM2			0.001
0	750 (87.5%)	505 (93.0%)
-1	107 (12.5%)	38 ( 7.0%)
Category 2 heart tracing			0.001
0	727 (84.8%)	423 (77.9%)
-1	130 (15.2%)	120 (22.1%)
Chronic villitis			0.191
0	665 (77.6%)	404 (74.4%)
-1	192 (22.4%)	139 (25.6%)
Abruption			0.071
0	832 (97.1%)	536 (98.7%)
-1	25 ( 2.9%)	7 ( 1.3%)
IUGR			0.001
0	810 (94.5%)	534 (98.3%)
-1	47 ( 5.5%)	9 ( 1.7%)
Twin pregnancy			0.052
0	833 (97.2%)	537 (98.9%)
-1	24 ( 2.8%)	6 ( 1.1%)
Cord.issues			0.128
0	805 (93.9%)	521 (95.9%)
-1	52 ( 6.1%)	22 ( 4.1%)
MPFD/MFI			0.567
0	817 (95.3%)	521 (96.1%)
-1	40 ( 4.7%)	21 ( 3.9%)
Others			0.182
0	809 (94.4%)	522 (96.1%)
-1	48 ( 5.6%)	21 ( 3.9%)
IUFD			0.309
0	854 (99.6%)	538 (99.1%)
-1	3 ( 0.4%)	5 ( 0.9%)
Cord coiling	4.0 [ 3.0; 5.0]	4.0 [ 3.0; 5.0]	0.922
Oligohydramnios			0.733
0	841 (98.1%)	535 (98.5%)
-1	16 ( 1.9%)	8 ( 1.5%)
Avascular.villi			1
0	762 (88.9%)	483 (89.0%)
-1	95 (11.1%)	60 (11.0%)
WBC (Normal less than 10.3)	9.4 [ 8.0;11.4]	10.4 [ 8.4;12.6]	0
Elevated WBC			0
Group 1 (<10.3 )(Normal)	380 (64.2%)	172 (49.0%)
Group 2 (10.4 to 12)	111 (18.8%)	77 (21.9%)
Group 3 (>12)	78 (13.2%)	61 (17.4%)
Group 4 (>15)	23 ( 3.9%)	41 (11.7%)
Neutrophil differential (%)	72.7 [68.6;77.3]	75.4 [68.5;81.2]	0
Left shift			0
0	397 (67.4%)	173 (49.9%)
-1	192 (32.6%)	174 (50.1%)
Lymphocytes (%)	18.4 [15.1;22.1]	16.5 [12.2;21.2]	0
Lymphopenia			0
0	562 (72.0%)	289 (57.1%)
-1	219 (28.0%)	217 (42.9%)
Body temperature	36.7 [36.5;37.0]	36.8 [36.6;37.0]	0.102
BMI	24.2 [23.5;25.0]	24.2 [23.8;24.6]	0.804
