# Supplementary material for: Correlation of histologic chorioamnionitis and intra-partum leukocytosis
Source: Research Square preprint supplement (doi:10.21203/rs.3.rs-151867/v1), 2021-01-26
Supplement: Supplementary file 3 [file eb3eb251b739b4b29c6d0c8b.xlsx]

## Sheet: Sheet 1 - Leukocytosis Table
Table 2: The ranges of leukocytosis and histopathological chorioamnionitis
WBC (total)	Group 1 (<10.3)	Group 2 (10.4 to 12)	Group 3 (>12)	Group 4 (>15)	p value
	(N=552)	(N=188)	(N=139)	(N=64)
Maternal.age	32.0 [28.0;36.0]	31.0 [26.0;34.0]	31.0 [26.5;35.0]	31.0 [26.5;34.0]	0.005
Vasculopathy					0.02
- Classic type	128 (23.2%)	44 (23.4%)	30 (21.6%)	18 (28.1%)
- Mixed type	41 ( 7.4%)	10 ( 5.3%)	2 ( 1.4%)	1 ( 1.6%)
- Mural hypertrophy	41 ( 7.4%)	18 ( 9.6%)	5 ( 3.6%)	1 ( 1.6%)
- No vasculopathy	342 (62.0%)	116 (61.7%)	102 (73.4%)	44 (68.8%)
Delivery					0.031
- C	217 (39.3%)	62 (33.0%)	39 (28.1%)	18 (28.1%)
- V	335 (60.7%)	126 (67.0%)	100 (71.9%)	46 (71.9%)
Clinical indications					0.384
0	80 (14.5%)	22 (11.7%)	21 (15.1%)	5 ( 7.8%)
-1	472 (85.5%)	166 (88.3%)	118 (84.9%)	59 (92.2%)
Preeclampsia/PIH					0.698
0	466 (84.4%)	158 (84.0%)	122 (87.8%)	56 (87.5%)
-1	86 (15.6%)	30 (16.0%)	17 (12.2%)	8 (12.5%)
Placental weight	465.5 [400.0;540.5]	455.5 [391.5;532.0]	469.0 [397.0;532.5]	436.5 [386.5;507.5]	0.205
Gestational age	39.0 [38.0;40.0]	39.0 [38.0;40.0]	39.0 [38.0;40.0]	40.0 [39.0;40.0]	0.245
Pre-term (less than 37 weeks)					0.9
0	496 (89.9%)	166 (88.3%)	123 (88.5%)	58 (90.6%)
-1	56 (10.1%)	22 (11.7%)	16 (11.5%)	6 ( 9.4%)
Pre-term (less than 32 weeks)					0.365
0	541 (98.0%)	180 (95.7%)	134 (96.4%)	62 (96.9%)
-1	11 ( 2.0%)	8 ( 4.3%)	5 ( 3.6%)	2 ( 3.1%)
Infarcts					0.648
0	512 (92.8%)	174 (92.6%)	130 (93.5%)	62 (96.9%)
-1	40 ( 7.2%)	14 ( 7.4%)	9 ( 6.5%)	2 ( 3.1%)
Acute chorioamnionitis					0
0	380 (68.8%)	111 (59.0%)	78 (56.1%)	23 (35.9%)
-1	172 (31.2%)	77 (41.0%)	61 (43.9%)	41 (64.1%)
Chronic deciduitis					0.537
0	354 (64.1%)	119 (63.3%)	94 (67.6%)	46 (71.9%)
-1	198 (35.9%)	69 (36.7%)	45 (32.4%)	18 (28.1%)
Acute funisitis					0
0	480 (87.0%)	161 (85.6%)	109 (78.4%)	41 (64.1%)
-1	72 (13.0%)	27 (14.4%)	30 (21.6%)	23 (35.9%)
Meconium					0.038
0	427 (77.4%)	143 (76.1%)	104 (74.8%)	39 (60.9%)
-1	125 (22.6%)	45 (23.9%)	35 (25.2%)	25 (39.1%)
Thrombosis					0.28
0	430 (77.9%)	136 (72.3%)	100 (71.9%)	47 (73.4%)
-1	122 (22.1%)	52 (27.7%)	39 (28.1%)	17 (26.6%)
GDM2					0.028
0	477 (86.4%)	174 (92.6%)	126 (90.6%)	61 (95.3%)
-1	75 (13.6%)	14 ( 7.4%)	13 ( 9.4%)	3 ( 4.7%)
Category 2 heart tracing					0.929
0	464 (84.1%)	156 (83.0%)	115 (82.7%)	52 (81.2%)
-1	88 (15.9%)	32 (17.0%)	24 (17.3%)	12 (18.8%)
Chronic villitis					0.259
0	414 (75.0%)	141 (75.0%)	103 (74.1%)	55 (85.9%)
-1	138 (25.0%)	47 (25.0%)	36 (25.9%)	9 (14.1%)
Abruption					0.07
0	545 (98.7%)	186 (98.9%)	133 (95.7%)	62 (96.9%)
-1	7 ( 1.3%)	2 ( 1.1%)	6 ( 4.3%)	2 ( 3.1%)
IUGR					0.172
0	531 (96.2%)	177 (94.1%)	135 (97.1%)	64 (100.0%)
-1	21 ( 3.8%)	11 ( 5.9%)	4 ( 2.9%)	0 ( 0.0%)
Twin pregnancy					0.797
0	539 (97.6%)	185 (98.4%)	137 (98.6%)	62 (96.9%)
-1	13 ( 2.4%)	3 ( 1.6%)	2 ( 1.4%)	2 ( 3.1%)
Cord.issues					0.274
0	519 (94.0%)	183 (97.3%)	131 (94.2%)	59 (92.2%)
-1	33 ( 6.0%)	5 ( 2.7%)	8 ( 5.8%)	5 ( 7.8%)
MPFD/MFI					0.876
0	533 (96.6%)	183 (97.3%)	133 (95.7%)	62 (96.9%)
-1	19 ( 3.4%)	5 ( 2.7%)	6 ( 4.3%)	2 ( 3.1%)
Others					0.612
0	527 (95.5%)	181 (96.3%)	136 (97.8%)	62 (96.9%)
-1	25 ( 4.5%)	7 ( 3.7%)	3 ( 2.2%)	2 ( 3.1%)
IUFD					0.776
0	549 (99.5%)	187 (99.5%)	139 (100.0%)	64 (100.0%)
-1	3 ( 0.5%)	1 ( 0.5%)	0 ( 0.0%)	0 ( 0.0%)
Cord coiling (per 10 cm)	3.0 [ 3.0; 5.0]	4.0 [ 3.0; 6.0]	4.0 [ 3.0; 5.0]	4.0 [ 3.0; 6.0]	0.01
Oligohydramnios					0.747
0	542 (98.2%)	185 (98.4%)	137 (98.6%)	64 (100.0%)
-1	10 ( 1.8%)	3 ( 1.6%)	2 ( 1.4%)	0 ( 0.0%)
Avascular.villi					0.146
0	475 (86.1%)	162 (86.2%)	116 (83.5%)	61 (95.3%)
-1	77 (13.9%)	26 (13.8%)	23 (16.5%)	3 ( 4.7%)
WBC	8.4 [ 7.4; 9.3]	11.1 [10.8;11.6]	13.3 [12.6;14.2]	16.4 [15.3;17.9]	0
Neutrophil differential (%)	70.4 [65.8;74.6]	76.2 [72.5;80.2]	79.2 [75.3;82.0]	83.9 [79.1;88.3]	0
Left shift (>75.6%)					0
0	444 (80.9%)	83 (44.9%)	36 (26.1%)	7 (10.9%)
-1	105 (19.1%)	102 (55.1%)	102 (73.9%)	57 (89.1%)
Lymphocytes (%)	20.4 [17.1;24.2]	15.5 [12.6;18.6]	13.6 [11.4;16.6]	10.1 [ 6.8;12.8]	0
Lymphopenia (less than 15.5%)					0
0	462 (84.6%)	94 (50.8%)	51 (37.0%)	11 (17.2%)
-1	84 (15.4%)	91 (49.2%)	87 (63.0%)	53 (82.8%)
Body temperature	36.8 [36.5;37.0]	36.7 [36.5;37.0]	36.7 [36.6;37.0]	36.8 [36.5;36.9]	0.65
BMI	24.2 [23.5;25.0]	24.2 [23.5;25.0]	24.6 [23.8;25.4]	24.2 [23.5;25.2]	0.215
